# Supplementary material for: Searching for ancient balanced polymorphisms shared between Neanderthals and Modern Humans
Source: PubMed Central journal article supplement (PMC5901502; doi:10.1590/1678-4685-gmb-2017-0308), 2018
Supplement: 1415-4757-GMB-41-01-2017-0308-s002.pdf [file 1415-4757-GMB-41-01-2017-0308-s002.pdf]

## Supplementary Material to “Searching for ancient balanced polymorphisms shared between Neanderthals and Modern Humans”

**TableS1** - Gene Ontology (GO) terms used for target genes playing a role in immune and behavioral systems.

| GO                    | Description                            | System     |
|-----------------------|----------------------------------------|------------|
| GO:0002118            | Aggressive behavior                    | Behavioral |
| GO:0002209            | Behavioral defense response            | Behavioral |
| GO:0001662            | Behavioral fear response               | Behavioral |
| GO:0048266            | Behavioral response to pain            | Behavioral |
| GO:0007619            | Courtship behavior                     | Behavioral |
| GO:0035640/GO:0035641 | Exploratory behavior                   | Behavioral |
| GO:0008050            | Female courtship behavior              | Behavioral |
| GO:0060180            | Female mating behavior                 | Behavioral |
| GO:0051866            | General adaptation syndrome            | Behavioral |
| GO:0007625            | Grooming behavior                      | Behavioral |
| GO:0002376            | Immune system process                  | Immune     |
| GO:0002121            | Inter-male aggressive behavior         | Behavioral |
| GO:0008049            | Male courtship behavior                | Behavioral |
| GO:0060179            | Male mating behavior                   | Behavioral |
| GO:0002125            | Maternal aggressive behavior           | Behavioral |
| GO:0042711            | Maternal behavior                      | Behavioral |
| GO:0007617            | Mating behavior                        | Behavioral |
| GO:0044705            | Multi-organism reproductive behavior   | Behavioral |
| GO:0007621            | Negativeregulationoffemalereceptivity  | Behavioral |
| GO:0060746            | Parental behavior                      | Behavioral |
| GO:2000822            | Regulation of behavioral fear response | Behavioral |
| GO:0045924            | Regulation of female receptivity       | Behavioral |
| GO:2000821            | Regulation of grooming behavior        | Behavioral |
| GO:0033057            | Reproductive Behavior                  | Behavioral |
| GO:0044704            | Single-organism reproductive behavior  | Behavioral |
| GO:0035176            | Social Behavior                        | Behavioral |
