# Supplementary material for: Searching for ancient balanced polymorphisms shared between Neanderthals and Modern Humans
Source: PubMed Central journal article supplement (PMC5901502; doi:10.1590/1678-4685-gmb-2017-0308), 2018
Supplement: 1415-4757-GMB-41-01-2017-0308-s003.pdf [file 1415-4757-GMB-41-01-2017-0308-s003.pdf]

## Supplementary Material to “Searching for ancient balanced polymorphisms shared between Neanderthals and Modern Humans”

**Table S2** –Target genes that could not be matched to at least one similar gene in the exome with respect to exon length, B-value, GC content and number of polymorphisms.

| Immune System   | Behavior System |
|-----------------|-----------------|
| <i>ACTB</i>     | <i>EIF4G1</i>   |
| <i>ACTG1</i>    | <i>HTT</i>      |
| <i>APOB</i>     | <i>SHANK1*</i>  |
| <i>C4B_2</i>    | <i>TRRAP</i>    |
| <i>C4B</i>      | <i>WDFY3</i>    |
| <i>CENPE</i>    | <i>KDM6B</i>    |
| <i>DYNC1H1</i>  |                 |
| <i>DYNC2H1</i>  |                 |
| <i>EP300</i>    |                 |
| <i>HLA-A</i>    |                 |
| <i>HLA-B</i>    |                 |
| <i>HLA-C</i>    |                 |
| <i>HLA-DQA1</i> |                 |
| <i>HLA-DQB1</i> |                 |
| <i>HLA-DRB1</i> |                 |
| <i>HLA-DRB5</i> |                 |
| <i>KMT2A</i>    |                 |
| <i>LYST</i>     |                 |
| <i>MAP1A</i>    |                 |
| <i>MUC4</i>     |                 |
| <i>NBEAL2</i>   |                 |
| <i>NCOA6</i>    |                 |
| <i>NOTCH1*</i>  |                 |
| <i>PIK3C2G*</i> |                 |
| <i>PKHD1L1</i>  |                 |
| <i>PRKDC</i>    |                 |

\*Genes excluded only from analyses including CpG sites.
