# Supplementary material for: Searching for ancient balanced polymorphisms shared between Neanderthals and Modern Humans
Source: PubMed Central journal article supplement (PMC5901502; doi:10.1590/1678-4685-gmb-2017-0308), 2018
Supplement: 1415-4757-GMB-41-01-2017-0308-s004.pdf [file 1415-4757-GMB-41-01-2017-0308-s004.pdf]

## Supplementary Material to “Searching for ancient balanced polymorphisms shared between Neanderthals and Modern Humans”

**Table S3** - General description of polymorphisms shared between Neanderthals\* and modern humans.

| Description                       | Number of polymorphisms   |
|-----------------------------------|---------------------------|
| Input matching reference assembly | 4117                      |
| Input matching as coding regions  | 99.95% (4115 out of 4117) |
| Tolerated                         | 86.33% (3554 out of 4117) |
| Deleterious                       | 10.54% (434 out of 4117)  |
| Not Scored                        | 3.13% (129 out of 4117)   |
| Nonsynonymous                     | 53.22% (2191 out of 4117) |
| Synonymous                        | 46.85% (1929 out of 4117) |
| NonCoding (UTR)                   | 0.48% (2 out of 4117)     |
| Novel                             | 7.68% (316 out of 4117)   |
| rsID                              | 92.32% (3801 out of 4117) |
| Genes                             | 2519                      |

\* Observed heterozygosity at the individual level was assumed to reflect population-wide polymorphism.
