# Supplementary material for: Searching for ancient balanced polymorphisms shared between Neanderthals and Modern Humans
Source: PubMed Central journal article supplement (PMC5901502; doi:10.1590/1678-4685-gmb-2017-0308), 2018
Supplement: 1415-4757-GMB-41-01-2017-0308-s005.pdf [file 1415-4757-GMB-41-01-2017-0308-s005.pdf]

## Supplementary Material to “Searching for ancient balanced polymorphisms shared between Neanderthals and Modern Humans”

**Table S4** - General description of polymorphisms shared between Neanderthals\* and modern humans, including sites within CpG sites.

| Description                       | Number of polymorphisms                 |
|-----------------------------------|-----------------------------------------|
| Input matching reference assembly | 8387                                    |
| Input matching as coding regions  | 99.9% (8382 out of 8387)                |
| Tolerated                         | 84.49% (7086 out of 8387)               |
| Deleterious                       | 12.72% (1067 out of 8387)               |
| Not Scored                        | 2.79% (234 out of 8387)                 |
| Nonsynonymous                     | 49.81% (4175 out of 8382)               |
| Synonymous                        | 50.19% (4207 out of 8382)               |
| NonCoding (UTR) and lincRNA       | 5.96 x 10 <sup>-4</sup> (5 out of 8387) |
| Novel                             | 11.42% (958 out of 8387)                |
| rsID                              | 88.58% (7429 out of 8387)               |
| Genes                             | 4900                                    |

\* Observed heterozygosity at the individual level was assumed to reflect population-wide polymorphism.
